# Supplementary material for: Multiple time points of transcriptome analysis revealed altered genes involved in maintaining hibernation in the hypothalamus of Tamias sibiricus
Source: Front Neurosci. 2024 Dec 23;18:1501223. doi: 10.3389/fnins.2024.1501223 (PMC11701215; doi:10.3389/fnins.2024.1501223)
Supplement: Supplementary file 2 [file Table_1.XLSX]

## Sheet: Sheet1
Table S1. List of Primers used in qRT-PCR analysis
TsACTB	F	CGCCCTTTCTCACTTGTTCTTTC
	R	TACTGAATACACACTCCAAGGCC
TsKCNC1	F	TCGTAAACTCTCCACACCACAG
	R	ACGGAACTAAGGAAGCAGTCTG
TsKCND3	F	ATCAGGAATGCTGCGTGTCA
	R	TCTTCGGCAAGCACGGTATT
TsSCN1A	F	GGACATCACAGAAGGGACAGTT
	R	AAGTTTGCTGGGAGAGATCAGG
TsSCN2A	F	TCCTTTGGGTCACTTAGATGCC
	R	TTGTAGTGTGTCTCTCTGCCAC
TsKCNA6	F	CAGCTACTTTCCCACTCCACAT
	R	AGCTGGATCTAGGGTGAGAGTT
TsHCN2	F	GAGATCGTCAACTTCAACTGCC
	R	ATCGGACAGCTTCATCTCCTTG
Note: Ts indicates Tamias sibiricus.
