# Supplementary material for: Multiple time points of transcriptome analysis revealed altered genes involved in maintaining hibernation in the hypothalamus of Tamias sibiricus
Source: Front Neurosci. 2024 Dec 23;18:1501223. doi: 10.3389/fnins.2024.1501223 (PMC11701215; doi:10.3389/fnins.2024.1501223)
Supplement: Supplementary file 4 [file Table_3.xlsx]

## Sheet: Sheet1
GeneID	Gene_name_y	Gene_name_match	geneSymbol	chr	strand	exonStart_0base	exonEnd	upstreamES	upstreamEE	downstreamES	downstreamEE	IC_SAMPLE_1	SC_SAMPLE_1	IC_SAMPLE_2	SC_SAMPLE_2	IncFormLen	SkipFormLen	PValue	FDR	IncLevel1	IncLevel2	IncLevelDifference	source_file	splicing_type
Gene:Tsib_chr1_1565	SLC24A2	TRUE		chr1	-	164259705	164259756	164241040	164241139	164282913	164283022	4,36,8	2,17,1	2,1,0	0,0,0	200	149	4.07577e-07	1.25733e-05	0.598,0.612,0.856	1.0,1.0,NA	-0.311	ACT-vs-M-EUT_SE_significant.xlsx	SE
Gene:Tsib_chr1_1565	SLC24A2	TRUE		chr1	-	164259705	164259756	164241040	164241139	164282913	164283022	1,21,8	7,11,2	2,1,0	0,0,0	200	149	5.96993e-12	3.77646e-10	0.096,0.587,0.749	1.0,1.0,NA	-0.523	M-DS-vs-M-EUT_SE_significant.xlsx	SE
Gene:Tsib_chr15_0041	WDR7	TRUE		chr15	+	10400148	10400247	10387480	10387569	10402639	10402758	29,103,61	6,32,25	3,4,1	0,4,5	248	149	8.50995e-26	9.86925e-24	0.744,0.659,0.594	1.0,0.375,0.107	0.172	M-DS-vs-M-EUT_SE_significant.xlsx	SE
Gene:Tsib_chr4_1256	PIP4K2B	TRUE		chr4	-			157368945	157369059	157372353	157372506	85194127	28,41,32	33,35,28	2,8,3	296	188	2.9746e-16	5.15067e-15	0.658,0.75,0.716	0.913,0.735,0.856	-0.127	M-DS-vs-M-EUT_MXE_significant.xlsx	MXE
Gene:Tsib_chr8_0569	ARAF	TRUE		chr8	-	110756460	110756606	110756155	110756358	110756703	110756731	45,59,66	3,2,6	40,53,34	0,0,3	295	149	9.34235e-08	4.23369e-06	0.883,0.937,0.847	1.0,1.0,0.851	-0.061	M-DS-vs-M-EUT_SE_significant.xlsx	SE
Gene:Tsib_chr2_1714	Scamp5	TRUE		chr2	-			201755902	201756020	201761624	201761753	191501227	263469264	61,63,67	108100138	306	251	0.00410885	0.0169872	0.373,0.467,0.414	0.317,0.341,0.285	0.104	ACT-vs-M-EUT_MXE_significant.xlsx	MXE
Gene:Tsib_chr2_1714	Scamp5	TRUE		chr2	-			201755902	201756020	201761624	201761753	271580461	266530425	61,63,67	108100138	306	251	0.000336897	0.0020938	0.455,0.473,0.471	0.317,0.341,0.285	0.152	M-DS-vs-M-EUT_MXE_significant.xlsx	MXE
Gene:Tsib_chr4_1250	Srcin1	TRUE		chr4	-	157180919	157181018	157170691	157170887	157184571	157184873	26,63,9	0,1,13	1,8,1	0,0,0	248	149	0.00277255	0.0483639	1.0,0.974,0.294	1.0,1.0,1.0	-0.244	ACT-vs-M-EUT_SE_significant.xlsx	SE
Gene:Tsib_chr4_1250	Srcin1	TRUE		chr4	-			157170691	157170887	157184571	157184873	26,63,9	23,60,16	1,8,1	3,5,10	248	173	0.000738704	0.00345675	0.441,0.423,0.282	0.189,0.527,0.065	0.122	ACT-vs-M-EUT_MXE_significant.xlsx	MXE
Gene:Tsib_chr4_1213	Ube2z	TRUE		chr4	-	155568795	155568868	155563319	155563431	155570806	155571129	81119108	1,7,5	22,24,21	6,2,4	222	149	8.2386e-19	7.25367e-17	0.982,0.919,0.935	0.711,0.89,0.779	0.152	M-DS-vs-M-EUT_SE_significant.xlsx	SE
Gene:Tsib_chr1_1773	AKAP2	TRUE		chr1	+	192996162	192996341	192979056	192980121	193007010	193007109	57,132,47	13,13,6	18,8,13	5,19,27	328	149	3.63606e-277	9.75867e-274	0.666,0.822,0.781	0.621,0.161,0.179	0.436	ACT-vs-M-EUT_SE_significant.xlsx	SE
Gene:Tsib_chr1_1773	AKAP2	TRUE		chr1	+	193001825	193001864	192996162	192996341	193007010	193007109	5,55,16	4,6,6	3,0,0	10,2,0	188	149	9.12819e-144	7.81356e-141	0.498,0.879,0.679	0.192,0.0,NA	0.589	ACT-vs-M-EUT_SE_significant.xlsx	SE
Gene:Tsib_chr1_1773	AKAP2	TRUE		chr1	+	193001825	193001864	192996162	192996341	193007010	193007109	22,32,36	9,10,12	3,0,0	10,2,0	188	149	5.50304e-101	4.74824e-98	0.66,0.717,0.704	0.192,0.0,NA	0.598	M-DS-vs-M-EUT_SE_significant.xlsx	SE
Gene:Tsib_chr1_1773	AKAP2	TRUE		chr1	+	192996162	192996341	192979056	192980121	193007010	193007109	44,81,84	26,26,24	18,8,13	5,19,27	328	149	7.90743e-90	5.16883e-87	0.435,0.586,0.614	0.621,0.161,0.179	0.225	M-DS-vs-M-EUT_SE_significant.xlsx	SE
Gene:Tsib_chr10_0423	CCDC126	TRUE		chr10	+	77897128	77897319	77887901	77887966	77900182	77900389	1,6,1	0,0,2	0,3,0	0,0,3	340	149	1.76387e-16	1.41444e-14	1.0,1.0,0.18	NA,1.0,0.0	0.227	M-DS-vs-M-EUT_SE_significant.xlsx	SE
Gene:Tsib_chr8_0616	Sytl5	TRUE		chr8	-	120003870	120003936	119998865	119999044	120005148	120005238	11,44,16	0,0,4	0,2,0	0,0,3	215	149	1.65313e-43	3.21258e-41	1.0,1.0,0.735	NA,1.0,0.0	0.412	M-DS-vs-M-EUT_SE_significant.xlsx	SE
Gene:Tsib_chr3_0580	CCDC24	TRUE		chr3	+	37263865	37263943	37263040	37263157	37264454	37264509	7,2,5	14,5,7	15,0,16	13,6,2	227	149	4.44665e-20	4.15232e-18	0.247,0.208,0.319	0.431,0.0,0.84	-0.166	M-DS-vs-M-EUT_SE_significant.xlsx	SE
Gene:Tsib_chr14_0574	EFR3B	TRUE		chr14	-			77801616	77801766	77827611	77827739	62167135	62133139	27,38,19	17,12,18	300	271	1.41442e-14	2.27855e-13	0.475,0.531,0.467	0.589,0.741,0.488	-0.115	M-DS-vs-M-EUT_MXE_significant.xlsx	MXE
Gene:Tsib_chr3_0622	FAAH	TRUE		chr3	+			39750187	39750312	39752893	39752993	22,27,46	7,18,23	7,2,3	2,3,12	275	247	0.00521352	0.0254238	0.738,0.574,0.642	0.759,0.375,0.183	0.212	M-DS-vs-M-EUT_MXE_significant.xlsx	MXE
